# Supplementary material for: New rationally designed hybrid polypyrrole@SnCoS4as an efficient anode for lithium-ion batteries
Source: Royal Society of Chemistry journal article supplement (doi:10.1039/d1nj00503k), 2021-01-01
Supplement: d1nj00503k1.pdf [file d1nj00503k1.pdf]

### Supporting Information:

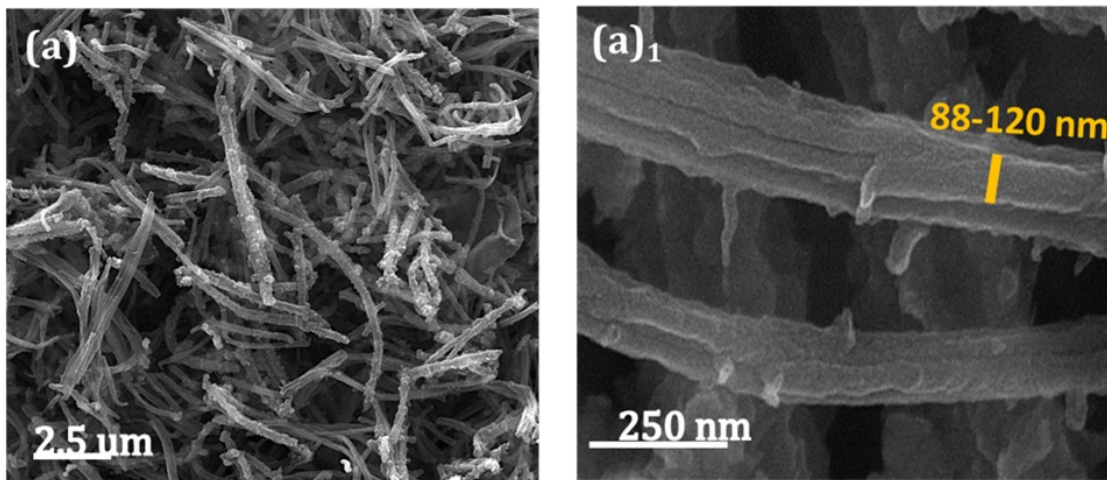

**FigureSI.1:** SEM images of Polypyrrole nanotube with different magnifications

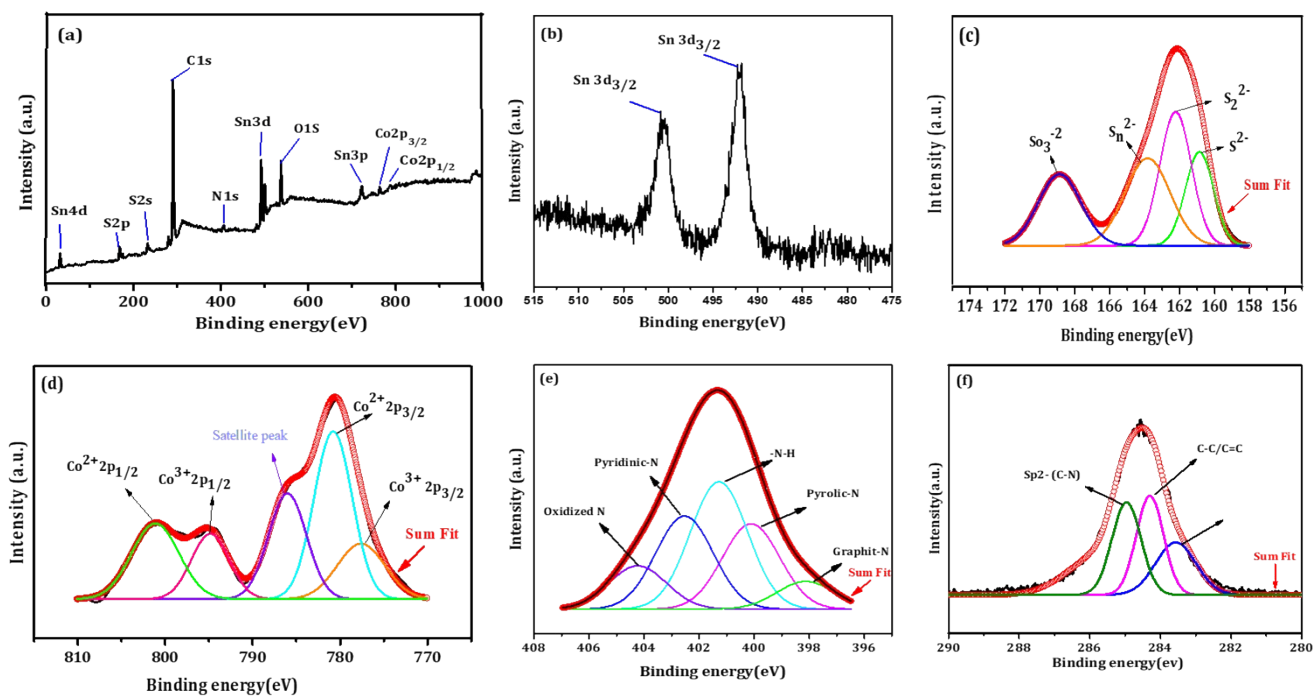

**FigureSI. 2.** XPS spectra of the PNT-SnCoS<sub>4</sub> composite: (a) Survey; (b) Sn 3d; (c) S 2p; (d) Co 2p (e) N 1S; and (f) C 1S.

**Table SI.1** Elemental Composition of PNT-SnCoS<sub>4</sub>

| Sample                   | Elements composition / Wt.% |     |     |     |     |     | Molar ratio       |
|--------------------------|-----------------------------|-----|-----|-----|-----|-----|-------------------|
|                          | C                           | O   | Sn  | Co  | S   | N   | Sn:Co:S           |
| P-PNT-SnCoS <sub>4</sub> | 81.5                        | 9.2 | 3.0 | 1.5 | 3.3 | 1.5 | 0.026:0.026:0.105 |
